# Supplementary material
Source: PubMed Central journal article supplement (PMC8387445)

Source Data for spot dilution assays in Extended Data Fig. 2h, j

Unprocessed Images

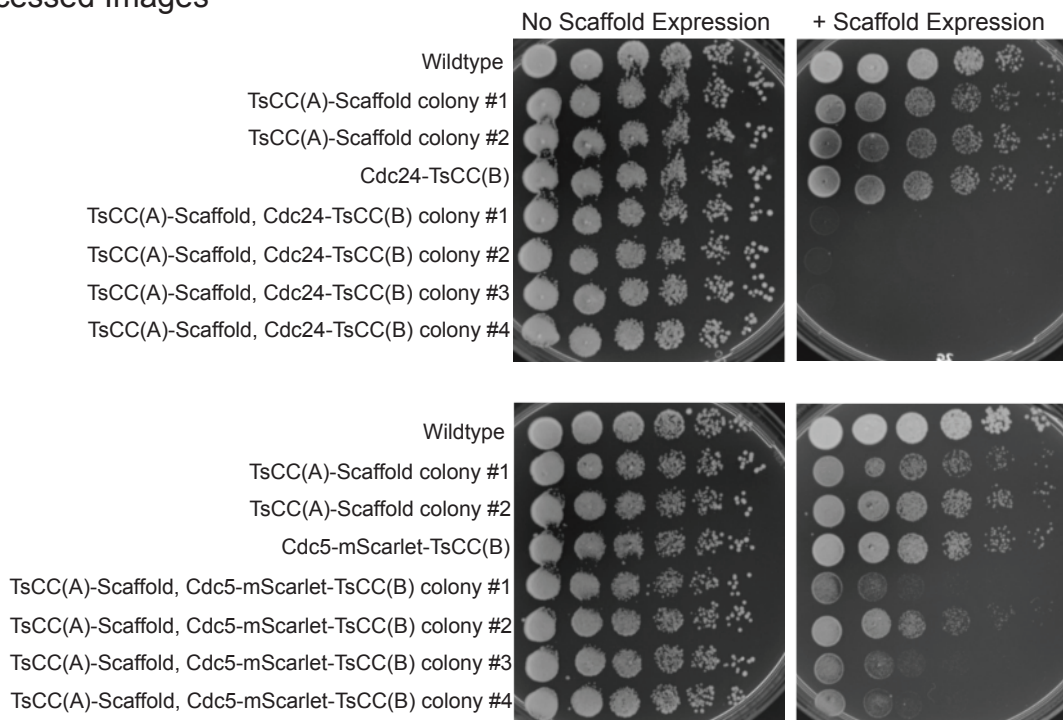

Spot dilutions displayed in Extended Data Fig. 2h, j (orange boxes)

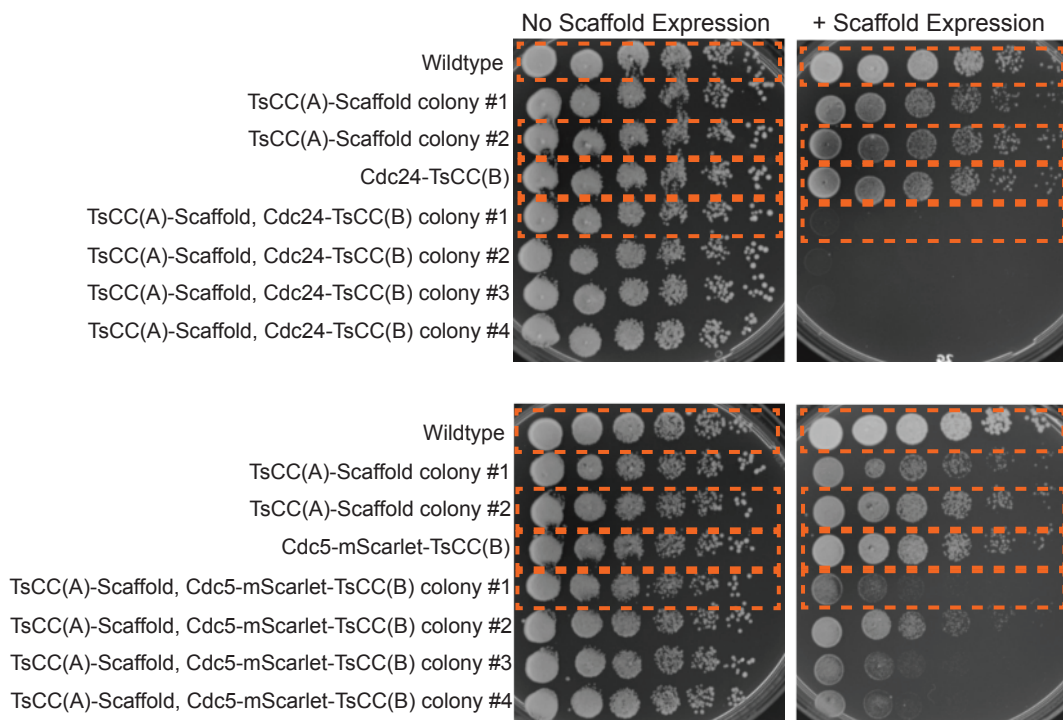

Supplement: NIHMS1718799-supplement-Source_Data_-_Extended_Data_Figure_2.pdf [file NIHMS1718799-supplement-Source_Data_-_Extended_Data_Figure_2.pdf]
