# Supplementary material
Source: PubMed Central journal article supplement (PMC8387445)
Supplement: NIHMS1718799-supplement-Source_Data_-_Extended_Data_Figure_4.pdf [file NIHMS1718799-supplement-Source_Data_-_Extended_Data_Figure_4.pdf]

Source Data for Extended Data Fig. 4b

Genomic DNA PCR to confirm mCherry-TsCC(B) integrations in U2OS cells

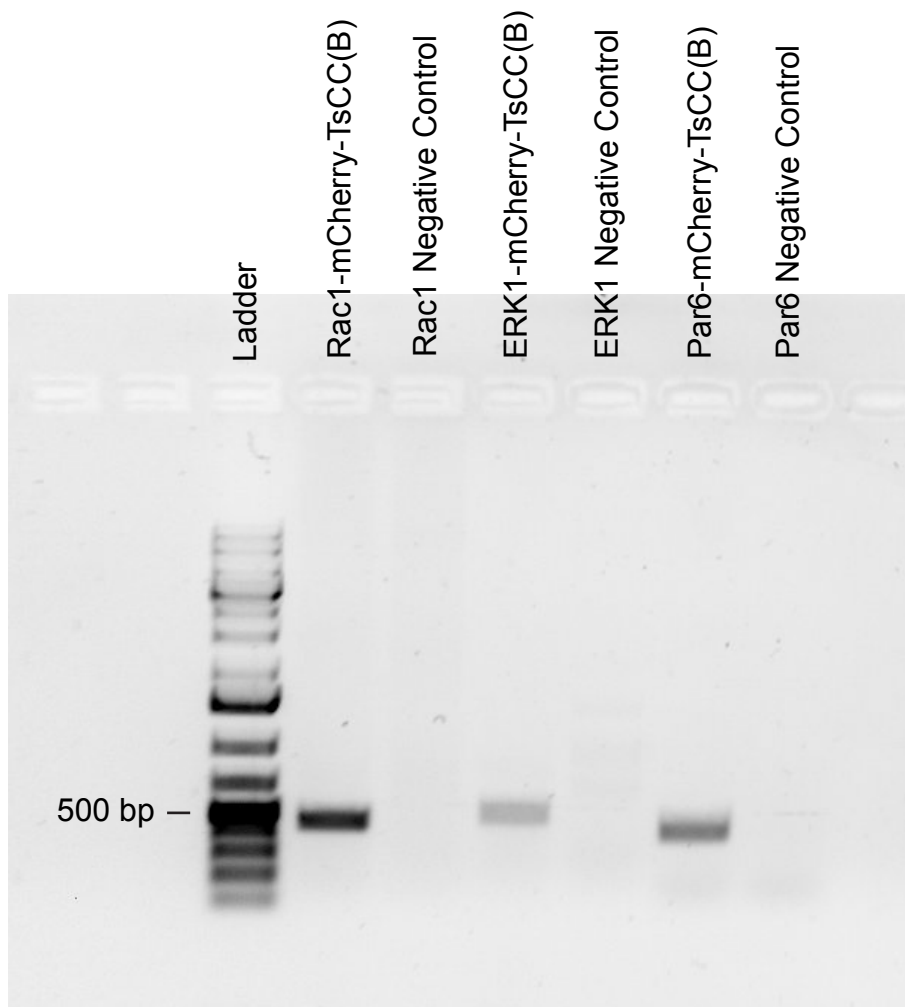

Expected PCR Product Sizes:

Rac1: 452 bp

ERK1: 511 bp

Par6: 424 bp

Negative Controls: No product
