# Supplementary material
Source: PubMed Central journal article supplement (PMC8387445)
Supplement: NIHMS1718799-supplement-Supplemental_Information.pdf [file NIHMS1718799-supplement-Supplemental_Information.pdf]

Supplementary Information

**Designer Membraneless Organelles Sequester Native Factors for Control of Cell Behavior**

Mikael V. Garabedian<sup>1</sup>, Wentao Wang<sup>2</sup>, Jorge B. Dabdoub<sup>1</sup>, Michelle Tong<sup>1</sup>, Reese M. Caldwell<sup>1</sup>, William Benman<sup>2</sup>, Benjamin S. Schuster<sup>3</sup>, Alexander Deiters<sup>4</sup>, Matthew C. Good<sup>1,2\*</sup>.

\*Corresponding Author: Matthew C. Good, Email: mattgood@pennmedicine.upenn.edu

**This PDF file includes:**

Supplementary Table 1

Supplementary Table 2

Supplementary Video Legends

Supplementary References

**Supplemental Files**

Supplementary Video 1 (.avi)

Supplementary Video 2 (.avi)

Supplementary Video 3 (.avi)

**Supplementary Table 1**

| <b>Strain Number</b> | <b>Genotype</b>                                                                                    | <b>Source</b>      |
|----------------------|----------------------------------------------------------------------------------------------------|--------------------|
| YEF473               | Wildtype. Mata, <i>his3 leu2 lys2 trp1 ura3</i>                                                    | Gift from Erfei Bi |
| yMV96                | Mata, <i>GAL1-SZ1-RGG-GFP::URA3, leu2 his3 lys2 trp1</i>                                           | This study         |
| yMV97                | Mata, <i>GAL1-SZ1-RGG-GFP-RGG::URA3, leu2 his3 lys2 trp1</i>                                       | This study         |
| yMV98                | Mata, <i>GAL1-SZ1-RGG-GFP-RGG-RGG::URA3, leu2 his3 lys2 trp1</i>                                   | This study         |
| yMV100               | Mata, <i>GAL1-SZ1-RGG-GFP-RGG-RGG::URA3, MET17-mScarlet-SZ2::LEU2 his3 lys2 trp1</i>               | This study         |
| yMV101               | Mata, <i>GAL1-TsCC(A)-RGG-GFP-RGG-RGG::URA3 his3 leu2 lys2 trp1</i>                                | This study         |
| yMV102               | Mata, <i>GAL1-TsCC(A)-RGG-GFP-RGG-RGG::URA3, MET17-mScarlet-TsCC(B)::LEU2 his3 lys2 trp1</i>       | This study         |
| yMV48                | Mata, <i>CDC24-TsCC(B)::KANMX6 his3 leu2 lys2 trp1 ura3</i>                                        | This study         |
| yMV65                | Mata, <i>CDC24-mScarlet-TsCC(B)::KANMX6 his3 leu2 lys2 trp1 ura3</i>                               | This study         |
| yMV103               | Mata, <i>GAL1-TsCC(A)-RGG-GFP-RGG-RGG::URA3, CDC24-TsCC(B)::KANMX6 his3 leu2 lys2 trp1</i>         | This study         |
| yMV105               | Mata, <i>GAL1-RGG-GFP-RGG-RGG::URA3, CDC24-mScarlet-TsCC(B)::KANMX6 his3 leu2 lys2 trp1</i>        | This study         |
| yMV104               | Mata, <i>GAL1-RGG-GFP-RGG-RGG::URA3, CDC24-mScarlet-TsCC(B)::KANMX6 his3 leu2 lys2 trp1</i>        | This study         |
| yMV121               | Mata, <i>CDC5-mScarlet-TsCC(B)::KANMX6 his3 leu2 lys2 trp1 ura3</i>                                | This study         |
| yMV122               | Mata, <i>GAL1-TsCC(A)-RGG-GFP-RGG-RGG::URA3, CDC5-mScarlet-TsCC(B)::KANMX6 his3 leu2 lys2 trp1</i> | This study         |
| yMV135               | Mata, <i>CDC24-PhoCI-TsCC(B)::KANMX6 his3 leu2 lys2 trp1 ura3</i>                                  | This study         |
| yMV136               | Mata, <i>GAL1-TsCC(A)-RGG-GFP-RGG-RGG::URA3, CDC24-PhoCI-TsCC(B)::KANMX6 his3 leu2 lys2 trp1</i>   | This study         |

|        |                                                                                                           |            |
|--------|-----------------------------------------------------------------------------------------------------------|------------|
| yMV140 | Mata, <i>tor1-1 fpr1Δ::KANMX6, FRB-RGG-GFP-RGG-RGG::URA3, MET17-mScarlet-FKBP::LEU2 his3Δ1 met15Δ0</i>    | This study |
| yMV142 | Mata, <i>tor1-1 fpr1Δ::KANMX6, FRB-RGG-GFP-RGG-RGG::URA3, CDC24-mScarlet-FKBP::HIS3 leu2Δ0 met15Δ0</i>    | This study |
| yMV147 | Mata, <i>BNR1ΔDAD-mScarlet-TsCC(B)::HIS3 bni1Δ::TRP1 leu2 lys2 ura3</i>                                   | This study |
| yMV149 | Mata, <i>GAL1-TsCC(A)-RGG-GFP-RGG-RGG::URA3, BNR1ΔDAD-mScarlet-TsCC(B)::HIS3 bni1Δ::TRP1 leu2 lys2</i>    | This study |
| yMV150 | Mata, <i>GAL1-TsCCA-PhoCl2f-RGG-GFP-RGG-RGG::URA3, CDC24-mScarlet-TsCC(B)::KANMX6 his3 leu2 lys2 trp1</i> |            |

**Supplementary Table 2**

| <b>Number</b> | <b>Plasmid</b>                                           | <b>Source</b>                   |
|---------------|----------------------------------------------------------|---------------------------------|
| pMV5          | Yiplac211- proGAL1--SZ1-RGG-GFP::URA3                    | This study                      |
| pMV6          | Yiplac211- proGAL1--SZ1-RGG-GFP-RGG::URA3                | This study                      |
| pMV7          | Yiplac211- proGAL1-SZ1-RGG-GFP-RGG-RGG::URA3             | This study                      |
| pMV8          | Yiplac211-proGAL1-TsCC(A)-RGG-GFP-RGG-RGG::URA3          | This study                      |
| pMV9          | Yiplac128-proMET17-mScarlet-SZ2::LEU2                    | This study                      |
| pMV10         | Yiplac128-proMET17-mScarlet-TsCC(B)::LEU2                | This study                      |
| pMV32         | pfa6a-mScarlet-TsCC(B)::KANMX6                           | This study                      |
| pMV33         | pfa6a-mScarlet-TsCC(B)::HIS3                             | This study                      |
| pMV34         | Yiplac211-proGAL1-FRB-RGG-GFP-RGG-RGG::URA3              | This study                      |
| pMV35         | Yiplac128-proMET17-mScarlet-FKBP::HIS3                   | This study                      |
| pMV36         | pfa6a-mScarlet-FKBP::HIS3                                | This study                      |
| pMV41         | pfa6a-PhoCI-TsCC(B)::KANMX6                              | This study                      |
| pJH2972       | pCas9::URA3                                              | Anand et al., 2017 <sup>2</sup> |
| pMV68         | pCas9 Bnr1-DAD gRNA::URA3                                | This study                      |
| pMV69         | pUC19 RAC1 5'-mCherry-TsCC(B)-Neo <sup>R</sup> - RAC1 3' | This study                      |
| pMV70         | pUC19 ERK1 5'-mCherry-TsCC(B)-Neo <sup>R</sup> - ERK1 3' | This study                      |

|       |                                                          |            |
|-------|----------------------------------------------------------|------------|
| pMV71 | pCas9-Guide RAC1 gRNA                                    | This study |
| pMV72 | pCas9-Guide ERK1 gRNA                                    | This study |
| pMV73 | pUC19 PAR6 5'-mCherry-TsCC(B)-Neo <sup>R</sup> - ERK1 3' | This study |
| pMV74 | pCas9-Guide PAR6 gRNA                                    | This study |
| pMV75 | Yiplac211-proGAL1-TsCC(A)-PhoCI2f-RGG-GFP-RGG-RGG::URA3  | This study |

**Supplementary Video 1.**

Rapamycin-induced client recruitment to preformed condensates in cells. Green: FRB-(RGG)<sub>3</sub> GFP-tagged scaffold. Red: exogenous client, mScarlet-TsCC(B).

**Supplementary Video 2.**

Inducible expression of scaffold disrupts native cortical localization of Cdc24, sequestering it to newly formed synthetic condensates. Green: TsCC(A)-(RGG)<sub>3</sub> GFP-tagged scaffold. Red: native client, Cdc24-mScarlet-TsCC(B).

**Supplementary Video 3.**

Induced condensate sequestration of endogenous client, Cdc24, upon rapamycin addition. Green: FRB-(RGG)<sub>3</sub> GFP-tagged scaffold. Red: native client, Cdc24-mScarlet-FKBP.

## Supplementary References

1. Schuster, B.S. *et al.* Controllable protein phase separation and modular recruitment to form responsive membraneless organelles. *Nat Commun* **9**, 2985 (2018).
2. Anand, R., Memisoglu, G. & Haber, J. Cas9-mediated gene editing in *Saccharomyces cerevisiae*. *Protocol Exchange* (2017).
