# Supplementary material
Source: PubMed Central journal article supplement (PMC8387445)

Source Data for spot dilution assays in Fig. 3d

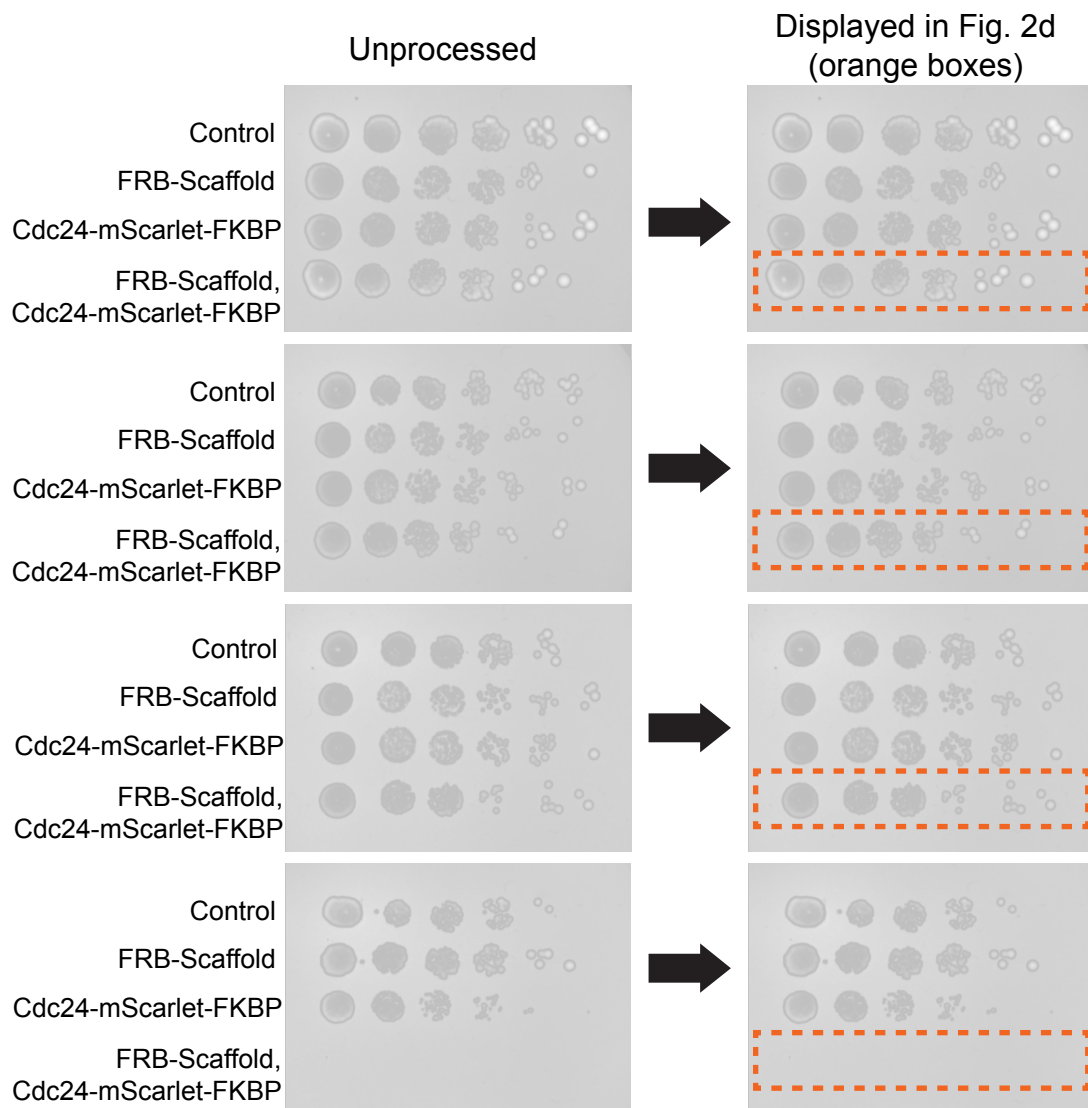

Supplement: NIHMS1718799-supplement-Source_Data_-_Figure_3.pdf [file NIHMS1718799-supplement-Source_Data_-_Figure_3.pdf]
